# Supplementary material
Source: publisher figshare collection journal article supplement (https://tandf.figshare.com/articles/dataset/_/1354041)
Supplement: Supplementary file 1 [file 4]

|              |            |          | Strap #1 | Strap #1 | Strap #2 | Strap #2 |
|--------------|------------|----------|----------|----------|----------|----------|
| Respirator   | Respirator | Sample # | UVGI     | Maximum  | UVGI     | Maximum  |
| manufacturer | Model      |          | dose     | Load     | dose     | Load     |
|              |            |          | (mJ/cm2) | (N)      | (mJ/cm2) | (N)      |
| 3M           | 1860       | 1        | 0        | 47.99    | 590      | 78.52    |
| 3M           | 1860       | 2        | 0        | 84.95    | 590      | 68.64    |
| 3M           | 1860       | 3        | 0        | 76.83    | 590      | 68.05    |
| 3M           | 1860       | 4        | 0        | 80.03    | 590      | 72.45    |
| 3M           | 1860       | 5        | 0        | 80.97    | 590      | 65.21    |
| 3M           | 1860       | 6        | 0        | 75.94    | 590      | 63.89    |
| 3M           | 1860       | 7        | 0        | 75.83    | 590      | 63.91    |
| 3M           | 1860       | 8        | 0        | 73.8     | 590      | 63.02    |
| 3M           | 1860       | 1        | 0        | 86       | 1180     | 59.56    |
| 3M           | 1860       | 2        | 0        | 89.5     | 1180     | 57.63    |
| 3M           | 1860       | 3        | 0        | 69.66    | 1180     | 76       |
| 3M           | 1860       | 4        | 0        | 69.66    | 1180     | 72.72    |
| 3M           | 1860       | 5        | 0        | 84.84    | 1180     | 66.09    |
| 3M           | 1860       | 6        | 0        | 90.04    | 1180     | 58.8     |
| 3M           | 1860       | 7        | 0        | 73       | 1180     | 74.56    |
| 3M           | 1860       | 8        | 0        | 84.94    | 1180     | 64.95    |
| 3M           | 1860       | 1        | 0        | 84.41    | 2360     | 52.5     |
| 3M           | 1860       | 2        | 0        | 63.36    | 2360     | 62.45    |
| 3M           | 1860       | 3        | 0        | 91.16    | 2360     | 59.52    |
| 3M           | 1860       | 4        | 0        | 65.44    | 2360     | 60.6     |
| 3M           | 1860       | 5        | 0        | 72.4     | 2360     | 61.87    |
| 3M           | 1860       | 6        | 0        | 67.62    | 2360     | 61.48    |
| 3M           | 1860       | 7        | 0        | 89.48    | 2360     | 57.75    |
| 3M           | 1860       | 8        | 0        | 73.08    | 2360     | 60.09    |
| 3M           | 9210       | 1        | 0        | 16.67    | 590      | 14.68    |
| 3M           | 9210       | 2        | 0        | 15.23    | 590      | 11.32    |
| 3M           | 9210       | 3        | 0        | 18.6     | 590      | 15.33    |
| 3M           | 9210       | 4        | 0        | 14.76    | 590      | 15.5     |
| 3M           | 9210       | 5        | 0        | 17.09    | 590      | 12.94    |
| 3M           | 9210       | 6        | 0        | 15.48    | 590      | 12.71    |
| 3M           | 9210       | 7        | 0        | 15.93    | 590      | 13.22    |
| 3M           | 9210       | 8        | 0        | 16.43    | 590      | 15.9     |
| 3M           | 9210       | 1        | 0        | 14.23    | 1180     | 12.08    |
| 3M           | 9210       | 2        | 0        | 14.49    | 1180     | 14.14    |
| 3M           | 9210       | 3        | 0        | 16.03    | 1180     | 12.21    |
| 3M           | 9210       | 4        | 0        | 15.21    | 1180     | 13.63    |
| 3M           | 9210       | 5        | 0        | 15.04    | 1180     | 11.62    |
| 3M           | 9210       | 6        | 0        | 16.7     | 1180     | 12.55    |
| 3M           | 9210       | 7        | 0        | 16.05    | 1180     | 11.79    |
| 3M           | 9210       | 8        | 0        | 15.56    | 1180     | 10.92    |
| 3M           | 9210       | 1        | 0        | 14.65    | 2360     | 11.55    |
| 3M           | 9210       | 2        | 0        | 12.87    | 2360     | 13.14    |
| 3M           | 9210       | 3        | 0        | 14.88    | 2360     | 13.15    |

|                |       |   |   |       |      |       |
|----------------|-------|---|---|-------|------|-------|
| 3M             | 9210  | 4 | 0 | 15.04 | 2360 | 11.99 |
| 3M             | 9210  | 5 | 0 | 14.96 | 2360 | 12.09 |
| 3M             | 9210  | 6 | 0 | 14.81 | 2360 | 10.99 |
| 3M             | 9210  | 7 | 0 | 16.12 | 2360 | 12.68 |
| 3M             | 9210  | 8 | 0 | 14.04 | 2360 | 13.38 |
| Gerson         | 1730  | 1 | 0 | 91.63 | 590  | 74.69 |
| Gerson         | 1730  | 2 | 0 | 75.53 | 590  | 73.83 |
| Gerson         | 1730  | 3 | 0 | 71.6  | 590  | 48.26 |
| Gerson         | 1730  | 4 | 0 | 78.8  | 590  | 76.15 |
| Gerson         | 1730  | 5 | 0 | 82.28 | 590  | 64.32 |
| Gerson         | 1730  | 6 | 0 | 87.13 | 590  | 38.96 |
| Gerson         | 1730  | 7 | 0 | 78.71 | 590  | 79.16 |
| Gerson         | 1730  | 8 | 0 | 84.23 | 590  | 77.71 |
| Gerson         | 1730  | 1 | 0 | 74.82 | 1180 | 66.06 |
| Gerson         | 1730  | 2 | 0 | 87.21 | 1180 | 56.74 |
| Gerson         | 1730  | 3 | 0 | 78.18 | 1180 | 66.34 |
| Gerson         | 1730  | 4 | 0 | 86.43 | 1180 | 60.18 |
| Gerson         | 1730  | 5 | 0 | 83.37 | 1180 | 64.04 |
| Gerson         | 1730  | 6 | 0 | 91.68 | 1180 | 66.26 |
| Gerson         | 1730  | 7 | 0 | 92.27 | 1180 | 70.28 |
| Gerson         | 1730  | 8 | 0 | 95.6  | 1180 | 59.03 |
| Gerson         | 1730  | 1 | 0 | 78.05 | 2360 | 42.53 |
| Gerson         | 1730  | 2 | 0 | 79.44 | 2360 | 37.26 |
| Gerson         | 1730  | 3 | 0 | 84.78 | 2360 | 43.06 |
| Gerson         | 1730  | 4 | 0 | 90.05 | 2360 | 27.99 |
| Gerson         | 1730  | 5 | 0 | 90.5  | 2360 | 47.28 |
| Gerson         | 1730  | 6 | 0 | 92.77 | 2360 | 51.98 |
| Gerson         | 1730  | 7 | 0 | 85.76 | 2360 | 46.97 |
| Gerson         | 1730  | 8 | 0 | 89.19 | 2360 | 33.63 |
| Kimberly-Clark | 46727 | 1 | 0 | 55.41 | 590  | 37.04 |
| Kimberly-Clark | 46727 | 2 | 0 | 52.15 | 590  | 38.12 |
| Kimberly-Clark | 46727 | 3 | 0 | 52.15 | 590  | 41.03 |
| Kimberly-Clark | 46727 | 4 | 0 | 54.84 | 590  | 39.89 |
| Kimberly-Clark | 46727 | 5 | 0 | 54.24 | 590  | 39.57 |
| Kimberly-Clark | 46727 | 6 | 0 | 53.88 | 590  | 38.46 |
| Kimberly-Clark | 46727 | 7 | 0 | 53.43 | 590  | 37.37 |
| Kimberly-Clark | 46727 | 8 | 0 | 52.13 | 590  | 41.22 |
| Kimberly-Clark | 46727 | 1 | 0 | 50.98 | 1180 | 35.5  |
| Kimberly-Clark | 46727 | 2 | 0 | 56.43 | 1180 | 33.21 |
| Kimberly-Clark | 46727 | 3 | 0 | 49.5  | 1180 | 36.75 |
| Kimberly-Clark | 46727 | 4 | 0 | 31.7  | 1180 | 33.96 |
| Kimberly-Clark | 46727 | 5 | 0 | 40.66 | 1180 | 26.1  |
| Kimberly-Clark | 46727 | 6 | 0 | 22.28 | 1180 | 37.26 |
| Kimberly-Clark | 46727 | 7 | 0 | 55.61 | 1180 | 24.54 |
| Kimberly-Clark | 46727 | 8 | 0 | 42.02 | 1180 | 32.13 |
| Kimberly-Clark | 46727 | 1 | 0 | 51.33 | 2360 | 29.83 |
| Kimberly-Clark | 46727 | 2 | 0 | 40.04 | 2360 | 30.58 |

|                |       |   |   |       |      |       |
|----------------|-------|---|---|-------|------|-------|
| Kimberly-Clark | 46727 | 3 | 0 | 41.08 | 2360 | 33.44 |
| Kimberly-Clark | 46727 | 4 | 0 | 36.99 | 2360 | 34.36 |
| Kimberly-Clark | 46727 | 5 | 0 | 42.39 | 2360 | 36.96 |
| Kimberly-Clark | 46727 | 6 | 0 | 44.27 | 2360 | 30.48 |
| Kimberly-Clark | 46727 | 7 | 0 | 20.88 | 2360 | 34.46 |
| Kimberly-Clark | 46727 | 8 | 0 | 24.73 | 2360 | 36.36 |
