# Supplementary material
Source: publisher figshare collection journal article supplement (https://tandf.figshare.com/articles/dataset/_/1354041)
Supplement: Supplementary file 2 [file 4]

|        |                |            |         |          |       |         |            |            | Maximum     | Maximum     | Most       |
|--------|----------------|------------|---------|----------|-------|---------|------------|------------|-------------|-------------|------------|
|        |                |            |         |          |       |         | Flow       | Flow       | particle    | particle    | particle   |
|        |                |            |         |          |       |         | Resistance | Resistance | Penetration | Penetration | MPPS       |
| Sample | Respirator     | Respirator |         |          |       | UV dose | Before UV  | After UV   | Before UV   | After UV    | Before     |
| Code   | Manufacturer   | model #    | Lot #   | Coupon # | Set # | (J/cm2) | (mm H2O)   | (mm H2O)   | (%)         | (%)         | ( $\mu$ m) |
| 18-1-1 | 3M             | 1860       | A12296  | 1        | 1     | 0       | 9.052      | 9.024      | 1.5         | 1.2         | 0.05       |
| 18-2-1 | 3M             | 1860       | A12296  | 2        | 1     | 0       | 8.518      | 8.508      | 1.7         | 1.4         | 0.05       |
| 18-3-1 | 3M             | 1860       | A12296  | 3        | 1     | 0       | 9.653      | 9.7        | 1.9         | 1.6         | 0.05       |
| 18-4-1 | 3M             | 1860       | A12296  | 4        | 1     | 0       | 11.566     | 11.536     | 1.2         | 1.1         | 0.05       |
| 92-1-1 | 3M             | 9210       | A121773 | 1        | 1     | 0       | 10.952     | 10.954     | 0.62        | 0.58        | 0.02       |
| 92-2-1 | 3M             | 9210       | A121773 | 2        | 1     | 0       | 10.846     | 10.942     | 0.58        | 0.67        | 0.02       |
| 92-3-1 | 3M             | 9210       | A121773 | 3        | 1     | 0       | 10.31      | 10.385     | 0.83        | 0.84        | 0.04       |
| 92-4-1 | 3M             | 9210       | A121773 | 4        | 1     | 0       | 9.207      | 9.298      | 0.98        | 1           | 0.04       |
| GE-1-1 | Gerson         | 1730       | 128A    | 1        | 1     | 0       | 9.563      | 9.655      | 3.6         | 2.9         | 0.05       |
| GE-2-1 | Gerson         | 1730       | 128A    | 2        | 1     | 0       | 9.228      | 9.3        | 3.5         | 3           | 0.084      |
| GE-3-1 | Gerson         | 1730       | 128A    | 3        | 1     | 0       | 9.216      | 9.298      | 3.9         | 3.8         | 0.089      |
| GE-4-1 | Gerson         | 1730       | 128A    | 4        | 1     | 0       | 9.124      | 9.205      | 3.7         | 3.7         | 0.05       |
| KC-1-1 | Kimberly-Clark | 46727      | A83     | 1        | 1     | 0       | 16.372     | 16.579     | 4.4         | 4.2         | 0.114      |
| KC-2-1 | Kimberly-Clark | 46727      | A83     | 2        | 1     | 0       | 20.643     | 20.826     | 2.7         | 2.9         | 0.095      |
| KC-3-1 | Kimberly-Clark | 46727      | A83     | 3        | 1     | 0       | 18.313     | 18.418     | 4.1         | 3.9         | 0.121      |
| KC-4-1 | Kimberly-Clark | 46727      | A83     | 4        | 1     | 0       | 19.865     | 20.011     | 3           | 2.7         | 0.101      |
|        |                |            |         |          |       |         |            |            |             |             |            |
| 18-1-2 | 3M             | 1860       | A12296  | 1        | 2     | 470     | 8.752      | 8.804      | 1.6         | 1.4         | 0.05       |
| 18-2-2 | 3M             | 1860       | A12296  | 2        | 2     | 470     | 8.674      | 8.791      | 1.7         | 1.4         | 0.05       |
| 18-3-2 | 3M             | 1860       | A12296  | 3        | 2     | 470     | 7.989      | 7.976      | 1.7         | 1.9         | 0.05       |
| 18-4-2 | 3M             | 1860       | A12296  | 4        | 2     | 470     | 8.491      | 8.54       | 1.5         | 1.9         | 0.05       |
| 92-1-2 | 3M             | 9210       | A121773 | 1        | 2     | 470     | 11.773     | 12.231     | 0.6         | 0.73        | 0.04       |
| 92-2-2 | 3M             | 9210       | A121773 | 2        | 2     | 470     | 9.129      | 9.613      | 0.94        | 1.4         | 0.04       |
| 92-3-2 | 3M             | 9210       | A121773 | 3        | 2     | 470     | 10.314     | 10.698     | 0.47        | 1           | 0.04       |
| 92-4-2 | 3M             | 9210       | A121773 | 4        | 2     | 470     | 10.819     | 11.425     | 0.51        | 0.91        | 0.04       |
| GE-1-2 | Gerson         | 1730       | 128A    | 1        | 2     | 470     | 9.583      | 9.58       | 3.7         | 5           | 0.084      |
| GE-2-2 | Gerson         | 1730       | 128A    | 2        | 2     | 470     | 9.81       | 9.751      | 3.9         | 4.9         | 0.089      |
| GE-3-2 | Gerson         | 1730       | 128A    | 3        | 2     | 470     | 9.758      | 9.561      | 3.1         | 4.3         | 0.079      |
| GE-4-2 | Gerson         | 1730       | 128A    | 4        | 2     | 470     | 8.938      | 8.774      | 3.5         | 5           | 0.089      |
| KC-1-2 | Kimberly-Clark | 46727      | A83     | 1        | 2     | 470     | 17.267     | 16.747     | 3.1         | 4.1         | 0.089      |
| KC-2-2 | Kimberly-Clark | 46727      | A83     | 2        | 2     | 470     | 17.285     | 17.213     | 4.2         | 5           | 0.121      |
| KC-3-2 | Kimberly-Clark | 46727      | A83     | 3        | 2     | 470     | 19.219     | 18.642     | 2.8         | 4           | 0.089      |

|        |                |       |         |   |   |     |        |        |       |       |       |
|--------|----------------|-------|---------|---|---|-----|--------|--------|-------|-------|-------|
| KC-4-2 | Kimberly-Clark | 46727 | A83     | 4 | 2 | 470 | 18.761 | 18.282 | 3.9   | 4.7   | 0.114 |
|        |                |       |         |   |   |     |        |        |       |       |       |
| 18-1-3 | 3M             | 1860  | A12296  | 1 | 3 | 950 | 10.299 | 10.285 | 1.4   | 1.4   | 0.05  |
| 18-2-3 | 3M             | 1860  | A12296  | 2 | 3 | 950 | 8.563  | 8.727  | 2.1   | 2.1   | 0.05  |
| 18-3-3 | 3M             | 1860  | A12296  | 3 | 3 | 950 | 9.009  | 9.211  | 2.1   | 1.7   | 0.04  |
| 18-4-3 | 3M             | 1860  | A12296  | 4 | 3 | 950 | 9.566  | 9.744  | 1.8   | 1.6   | 0.04  |
| 92-1-3 | 3M             | 9210  | A121773 | 1 | 3 | 950 | 11.155 | 10.472 | 0.56  | 0.73  | 0.04  |
| 92-2-3 | 3M             | 9210  | A121773 | 2 | 3 | 950 | 11.433 | 10.563 | 0.65  | 0.79  | 0.04  |
| 92-3-3 | 3M             | 9210  | A121773 | 3 | 3 | 950 | 9.86   | 9.748  | 0.86  | 0.8   | 0.04  |
| 92-4-3 | 3M             | 9210  | A121773 | 4 | 3 | 950 | 11.269 | 10.577 | 0.81  | 0.86  | 0.04  |
| GE-1-3 | Gerson         | 1730  | 128A    | 1 | 3 | 950 | 8.413  | 8.217  | 4.5   | 4.5   | 0.05  |
| GE-2-3 | Gerson         | 1730  | 128A    | 2 | 3 | 950 | 9.837  | 9.573  | 3.7   | 3.3   | 0.05  |
| GE-3-3 | Gerson         | 1730  | 128A    | 3 | 3 | 950 | 8.755  | 8.671  | 3.8   | 3.8   | 0.05  |
| GE-4-3 | Gerson         | 1730  | 128A    | 4 | 3 | 950 | 9.484  | 9.405  | 3.7   | 3.6   | 0.089 |
| KC-1-3 | Kimberly-Clark | 46727 | A83     | 1 | 3 | 950 | 17.668 | 17.756 | 4.1   | 4.9   | 0.114 |
| KC-2-3 | Kimberly-Clark | 46727 | A83     | 2 | 3 | 950 | 16.645 | 15.774 | 2.8   | 3.6   | 0.089 |
| KC-3-3 | Kimberly-Clark | 46727 | A83     | 3 | 3 | 950 | 18.329 | 18.039 | 3.8   | 4.6   | 0.121 |
| KC-4-3 | Kimberly-Clark | 46727 | A83     | 4 | 3 | 950 | 16.975 | 16.201 | 3     | 3.8   | 0.095 |
|        |                |       |         |   |   |     |        |        | 3.425 | 4.225 |       |
| 18-1-4 | 3M             | 1860  | A12296  | 1 | 4 | 710 | 8.588  | 8.856  | 1.3   | 2.3   | 0.05  |
| 18-2-4 | 3M             | 1860  | A12296  | 2 | 4 | 710 | 8.554  | 8.668  | 1.3   | 2     | 0.04  |
| 18-3-4 | 3M             | 1860  | A12296  | 3 | 4 | 710 | 11.696 | 11.718 | 0.91  | 1.1   | 0.05  |
| 18-4-4 | 3M             | 1860  | A12296  | 4 | 4 | 710 | 10.565 | 10.555 | 1.1   | 1.5   | 0.05  |
| 92-1-4 | 3M             | 9210  | A121773 | 1 | 4 | 710 | 11.133 | 10.765 | 0.71  | 0.63  | 0.04  |
| 92-2-4 | 3M             | 9210  | A121773 | 2 | 4 | 710 | 11.433 | 11.185 | 0.51  | 0.8   | 0.02  |
| 92-3-4 | 3M             | 9210  | A121773 | 3 | 4 | 710 | 9.568  | 9.022  | 0.67  | 1.9   | 0.05  |
| 92-4-4 | 3M             | 9210  | A121773 | 4 | 4 | 710 | 9.16   | 9.394  | 0.88  | 1.2   | 0.05  |
| GE-1-4 | Gerson         | 1730  | 128A    | 1 | 4 | 710 | 10.755 | 10.396 | 2.7   | 3.1   | 0.095 |
| GE-2-4 | Gerson         | 1730  | 128A    | 2 | 4 | 710 | 9.477  | 9.262  | 4.4   | 4.6   | 0.101 |
| GE-3-4 | Gerson         | 1730  | 128A    | 3 | 4 | 710 | 9.539  | 9.295  | 4.5   | 4.1   | 0.05  |
| GE-4-4 | Gerson         | 1730  | 128A    | 4 | 4 | 710 | 9.764  | 9.491  | 3.7   | 3.5   | 0.089 |
| KC-1-4 | Kimberly-Clark | 46727 | A83     | 1 | 4 | 710 | 19.76  | 19.099 | 2.8   | 3.5   | 0.1   |
| KC-2-4 | Kimberly-Clark | 46727 | A83     | 2 | 4 | 710 | 19.487 | 18.99  | 4.3   | 4.8   | 0.114 |
| KC-3-4 | Kimberly-Clark | 46727 | A83     | 3 | 4 | 710 | 17.803 | 16.841 | 2.7   | 4     | 0.084 |
| KC-4-4 | Kimberly-Clark | 46727 | A83     | 4 | 4 | 710 | 15.973 | 15.737 | 4.1   | 5.1   | 0.114 |
|        |                |       |         |   |   |     |        |        |       |       |       |
| 18-1-5 | 3M             | 1860  | A12296  | 1 | 5 | 120 | 9.668  | 9.754  | 1.4   | 1.8   | 0.05  |

|        |                |       |         |   |   |     |        |        |      |      |       |
|--------|----------------|-------|---------|---|---|-----|--------|--------|------|------|-------|
| 18-2-5 | 3M             | 1860  | A12296  | 2 | 5 | 120 | 8.105  | 7.987  | 1.9  | 1.8  | 0.05  |
| 18-3-5 | 3M             | 1860  | A12296  | 3 | 5 | 120 | 8.595  | 8.515  | 2    | 2.4  | 0.05  |
| 18-4-5 | 3M             | 1860  | A12296  | 4 | 5 | 120 | 7.178  | 7.142  | 2.6  | 2.6  | 0.05  |
| 92-1-5 | 3M             | 9210  | A121773 | 1 | 5 | 120 | 10.105 | 10.031 | 0.78 | 0.82 | 0.04  |
| 92-2-5 | 3M             | 9210  | A121773 | 2 | 5 | 120 | 9.945  | 9.992  | 0.64 | 0.76 | 0.04  |
| 92-3-5 | 3M             | 9210  | A121773 | 3 | 5 | 120 | 11.086 | 11.169 | 0.51 | 0.5  | 0.04  |
| 92-4-5 | 3M             | 9210  | A121773 | 4 | 5 | 120 | 10.961 | 10.915 | 1.1  | 0.94 | 0.04  |
| GE-1-5 | Gerson         | 1730  | 128A    | 1 | 5 | 120 | 10.174 | 10.218 | 3.2  | 3.8  | 0.075 |
| GE-2-5 | Gerson         | 1730  | 128A    | 2 | 5 | 120 | 8.898  | 8.862  | 3    | 4    | 0.07  |
| GE-3-5 | Gerson         | 1730  | 128A    | 3 | 5 | 120 | 11.821 | 11.905 | 3    | 3.3  | 0.079 |
| GE-4-5 | Gerson         | 1730  | 128A    | 4 | 5 | 120 | 9.948  | 9.939  | 3.1  | 3.6  | 0.079 |
| KC-1-5 | Kimberly-Clark | 46727 | A83     | 1 | 5 | 120 | 18.289 | 18.013 | 3.1  | 3.3  | 0.08  |
| KC-2-5 | Kimberly-Clark | 46727 | A83     | 2 | 5 | 120 | 18.146 | 18.061 | 4.1  | 4.4  | 0.107 |
| KC-3-5 | Kimberly-Clark | 46727 | A83     | 3 | 5 | 120 | 19.679 | 19.406 | 3.2  | 3.2  | 0.084 |
| KC-4-5 | Kimberly-Clark | 46727 | A83     | 4 | 5 | 120 | 16.755 | 16.861 | 4.4  | 5.3  | 0.101 |
|        |                |       |         |   |   |     |        |        |      |      |       |
| 18-1-6 | 3M             | 1860  | A12296  | 1 | 6 | 240 | 8.678  | 8.667  | 1.9  | 3    | 0.05  |
| 18-2-6 | 3M             | 1860  | A12296  | 2 | 6 | 240 | 9.039  | 8.936  | 2    | 2.7  | 0.05  |
| 18-3-6 | 3M             | 1860  | A12296  | 3 | 6 | 240 | 9.668  | 9.573  | 1.5  | 2.4  | 0.05  |
| 18-4-6 | 3M             | 1860  | A12296  | 4 | 6 | 240 | 8.497  | 8.418  | 1.6  | 2.2  | 0.05  |
| 92-1-6 | 3M             | 9210  | A121773 | 1 | 6 | 240 | 12.163 | 12.091 | 0.33 | 0.6  | 0.05  |
| 92-2-6 | 3M             | 9210  | A121773 | 2 | 6 | 240 | 9.249  | 9.291  | 1.7  | 1.7  | 0.05  |
| 92-3-6 | 3M             | 9210  | A121773 | 3 | 6 | 240 | 11.184 | 11.356 | 0.75 | 1    | 0.04  |
| 92-4-6 | 3M             | 9210  | A121773 | 4 | 6 | 240 | 9.311  | 9.482  | 1.1  | 1.4  | 0.04  |
| GE-1-6 | Gerson         | 1730  | 128A    | 1 | 6 | 240 | 8.936  | 8.9    | 4.3  | 5.2  | 0.05  |
| GE-2-6 | Gerson         | 1730  | 128A    | 2 | 6 | 240 | 9.919  | 9.786  | 3.1  | 4.4  | 0.05  |
| GE-3-6 | Gerson         | 1730  | 128A    | 3 | 6 | 240 | 10.19  | 10.089 | 4.2  | 5.3  | 0.05  |
| GE-4-6 | Gerson         | 1730  | 128A    | 4 | 6 | 240 | 10.915 | 11.008 | 4.1  | 4.9  | 0.05  |
| KC-1-6 | Kimberly-Clark | 46727 | A83     | 1 | 6 | 240 | 19.631 | 19.236 | 3.6  | 4.2  | 0.075 |
| KC-2-6 | Kimberly-Clark | 46727 | A83     | 2 | 6 | 240 | 17.914 | 18.033 | 4.8  | 4.9  | 0.089 |
| KC-3-6 | Kimberly-Clark | 46727 | A83     | 3 | 6 | 240 | 18.017 | 17.981 | 4.8  | 5.2  | 0.095 |
| KC-4-6 | Kimberly-Clark | 46727 | A83     | 4 | 6 | 240 | 16.684 | 16.69  | 3.7  | 3.5  | 0.05  |

|                                   |                 |                 |                |                |
|-----------------------------------|-----------------|-----------------|----------------|----------------|
| <i>penetrating</i>                |                 |                 |                |                |
| <i>size (MPPS)</i>                | <i>Burst</i>    | <i>strength</i> |                |                |
| <i>MPPS</i>                       | <i>after UV</i> | <i>exposure</i> |                |                |
| <i>After</i>                      | <i>Layer 1</i>  | <i>Layer 2</i>  | <i>Layer 3</i> | <i>Layer 4</i> |
| <i>(<math>\mu\text{m}</math>)</i> | <i>(N)</i>      | <i>(N)</i>      | <i>(N)</i>     | <i>(N)</i>     |
| 0.05                              | 88.22           | 15.514          | 218.564        |                |
| 0.066                             | 93.002          | 12.733          | 224.11         |                |
| 0.079                             | 102.121         | 12.062          | 312.67         |                |
| 0.04                              | 91.028          | 15.066          | 238.75         |                |
| 0.04                              | 72.936          | 248.237         | 30.438         |                |
| 0.03                              | 87.157          | 124.747         | 30.342         |                |
| 0.04                              | 91.477          | 285.574         | 26.92          |                |
| 0.04                              | 81.802          | 199.34          | 25.306         |                |
| 0.089                             | 170.735         | 10.962          | 157.229        |                |
| 0.084                             | 216.148         | 10.35           | 136.643        |                |
| 0.084                             | 113.166         | 11.653          | 106.358        |                |
| 0.095                             | 166.708         | 10.211          | 152.488        |                |
| 0.114                             | 47.452          | 44.422          | 15.655         | 12.732         |
| 0.084                             | 50.404          | 44.303          | 14.702         | 13.732         |
| 0.121                             | 53.633          | 42.938          | 9.627          | 32.952         |
| 0.095                             | 45.77           | 45.441          | 15.261         | 6.52           |
|                                   |                 |                 |                |                |
| 0.05                              | 31.303          | 5.203           | 272.996        |                |
| 0.05                              | 29.337          | 5.078           | 214.667        |                |
| 0.05                              | 38.949          | 5.385           | 213.698        |                |
| 0.05                              | 36.527          | 4.878           | 191.536        |                |
| 0.04                              | 11.826          | 86.009          | 0.952          |                |
| 0.05                              | 5.819           | 35.24           | 0.275          |                |
| 0.04                              | 5.984           | 35.851          | 0.366          |                |
| 0.04                              | 8.774           | 47.923          | 0.61           |                |
| 0.05                              | 108.13          | 4.201           | 93.468         |                |
| 0.05                              | 137.314         | 5.106           | 133.999        |                |
| 0.05                              | 124.026         | 8.502           | 147.634        |                |
| 0.05                              | 103.855         | 12.56           | 109.378        |                |
| 0.075                             | 3.212           | 0.807           | 13.748         | 5.012          |
| 0.101                             | 16.833          | 2.155           | 15.343         | 6.051          |
| 0.079                             | 3.763           | 0.73            | 14.231         | 5.938          |

|       |         |        |         |        |
|-------|---------|--------|---------|--------|
| 0.101 | 9.357   | 2.132  | 15.069  | 7.134  |
|       |         |        |         |        |
| 0.05  | 10      | 0.22   | 103.18  |        |
| 0.075 | 9.152   | 0.503  | 204.34  |        |
| 0.075 | 5.031   | 0.535  | 232.439 |        |
| 0.05  | 7.574   | 1.013  | 289.31  |        |
| 0.04  | 0.99    | 7.158  | 0.061   |        |
| 0.04  | 1.264   | 12.132 | 0.102   |        |
| 0.03  | 1.12    | 8.661  | 0.161   |        |
| 0.04  | 1.727   | 7.556  | 0.11    |        |
| 0.089 | 105.844 | 0.341  | 83.402  |        |
| 0.089 | 130.35  | 1.833  | 96.477  |        |
| 0.101 | 111.005 | 0.323  | 76.713  |        |
| 0.095 | 85.229  | 0.509  | 124.026 |        |
| 0.2   | 0.966   | 0.234  | 14.536  | 11.309 |
| 0.095 | 0.567   | 0.089  | 13.609  | 3.329  |
| 0.2   | 0.867   | 0.246  | 15.02   | 4.289  |
| 0.107 | 0.367   | 0.061  | 13.204  | 4.475  |
|       |         |        |         |        |
| 0.05  | 9.126   | 1.219  | 171.369 |        |
| 0.05  | 6.254   | 0.379  | 173.06  |        |
| 0.05  | 5.621   | 2.21   | 340.238 |        |
| 0.05  | 12.074  | 2.301  | 215.049 |        |
| 0.04  | 1.246   | 6.499  | 0.317   |        |
| 0.04  | 1.288   | 5.893  | 0.173   |        |
| 0.023 | 0.883   | 3.92   | 0.08    |        |
| 0.04  | 0.736   | 9.031  | 0.161   |        |
| 0.075 | 134.785 | 3.03   | 127.731 |        |
| 0.089 | 105.506 | 0.806  | 114.714 |        |
| 0.05  | 92.457  | 2.327  | 86.338  |        |
| 0.095 | 121.51  | 4.032  | 130.157 |        |
| 0.1   | 1.159   | 0.557  | 14.339  | 5.139  |
| 0.101 | 2.648   | 1.058  | 15.248  | 8.019  |
| 0.05  | 1.448   | 0.434  | 15.305  | 6.785  |
| 0.101 | 2.416   | 1.068  | 15.125  | 7.348  |
|       |         |        |         |        |
| 0.04  | 77.756  | 16.846 | 192.739 |        |

|       |         |         |         |        |
|-------|---------|---------|---------|--------|
| 0.05  | 91.559  | 11.726  | 152.727 |        |
| 0.05  | 96.878  | 14.072  | 132.425 |        |
| 0.05  | 67.888  | 13.839  | 171.106 |        |
| 0.04  | 63.642  | 167.446 | 16.474  |        |
| 0.04  | 81.322  | 148.432 | 19.827  |        |
| 0.04  | 84.906  | 155.665 | 19.391  |        |
| 0.04  | 74.853  | 166.581 | 19.266  |        |
| 0.05  | 128.619 | 9.06    | 125.625 |        |
| 0.05  | 91.386  | 9.811   | 105.766 |        |
| 0.05  | 120.9   | 8.131   | 134.539 |        |
| 0.05  | 109.084 | 11.269  | 152.761 |        |
| 0.079 | 45.396  | 39.808  | 16.547  | 10.264 |
| 0.107 | 41.588  | 44.367  | 16.352  | 7.957  |
| 0.089 | 50.73   | 38.089  | 15.668  | 14.274 |
| 0.06  | 50.006  | 41.43   | 15.948  | 5.951  |
|       |         |         |         |        |
| 0.04  | 62.515  | 7.763   | 233.598 |        |
| 0.04  | 78.007  | 10.241  | 178.94  |        |
| 0.04  | 80.08   | 13.361  | 189.653 |        |
| 0.04  | 71.925  | 10.72   | 141.6   |        |
| 0.04  | 41.094  | 76.887  | 8.198   |        |
| 0.025 | 43.825  | 145.671 | 7.404   |        |
| 0.023 | 36.596  | 79.627  | 9.816   |        |
| 0.04  | 38.527  | 113.279 | 8.217   |        |
| 0.05  | 123.08  | 7.175   | 67.383  |        |
| 0.05  | 126.871 | 10.93   | 97.643  |        |
| 0.05  | 67.898  | 7.749   | 164.208 |        |
| 0.05  | 99.118  | 8.355   | 130.561 |        |
| 0.05  | 36.258  | 16.971  | 15.716  | 12.704 |
| 0.089 | 28.559  | 31.917  | 15.342  | 11.836 |
| 0.095 | 30.722  | 21.294  | 16.17   | 8.394  |
| 0.075 | 18.7    | 12.91   | 17.108  | 9.408  |
